# Supplementary material for: VGLL2 and TEAD1 fusion proteins identified in human sarcoma drive YAP/TAZ-independent tumorigenesis by engaging EP300
Source: eLife journal article supplement (doi:10.7554/elife.98386), 2024-07-01
Supplement: fig2-data1 [file elife-98386-fig2-data1-v1.zip]

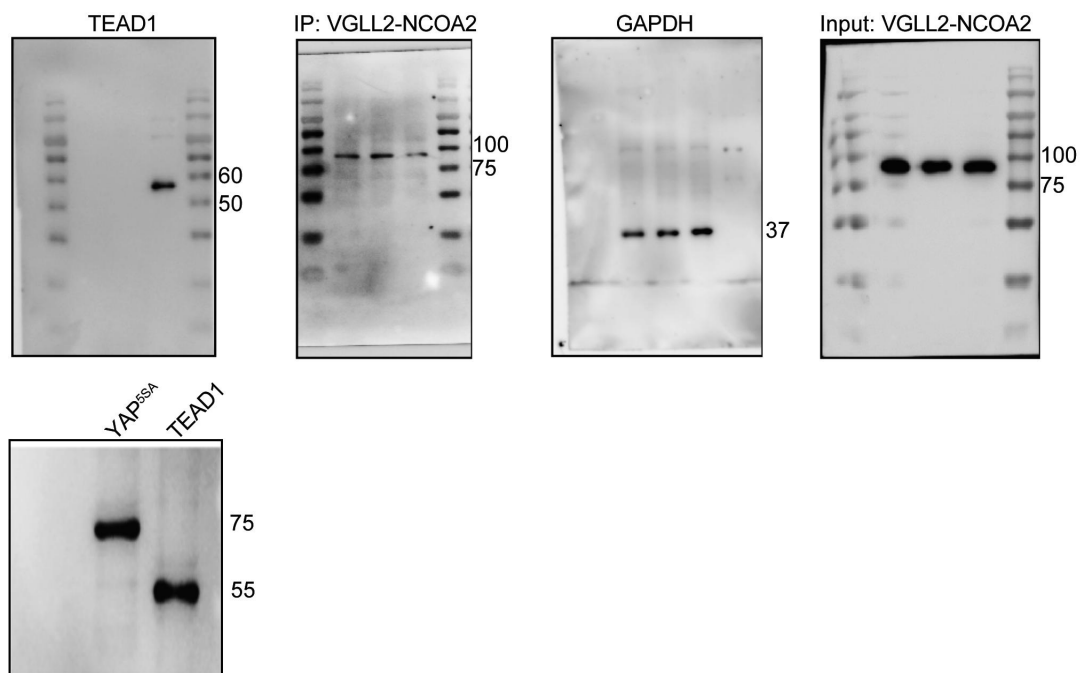

input: VGLL2-NCOA2

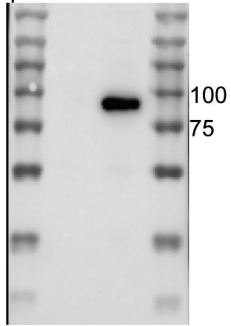

IP: VGLL2-NCOA2

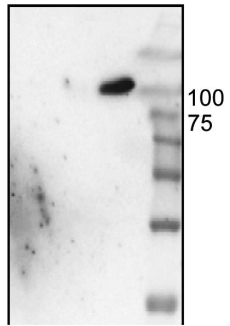

Input: YAP/TAZ

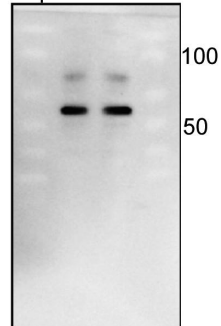

IP: YAP/TAZ

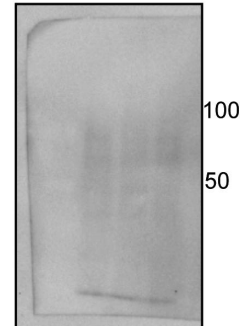

Input: panTEAD

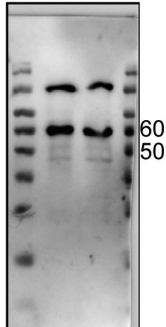

IP: panTEAD

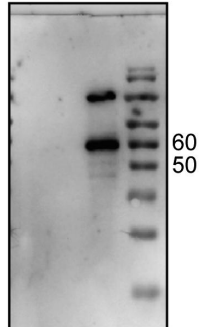

GAPDH

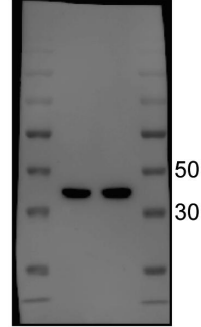

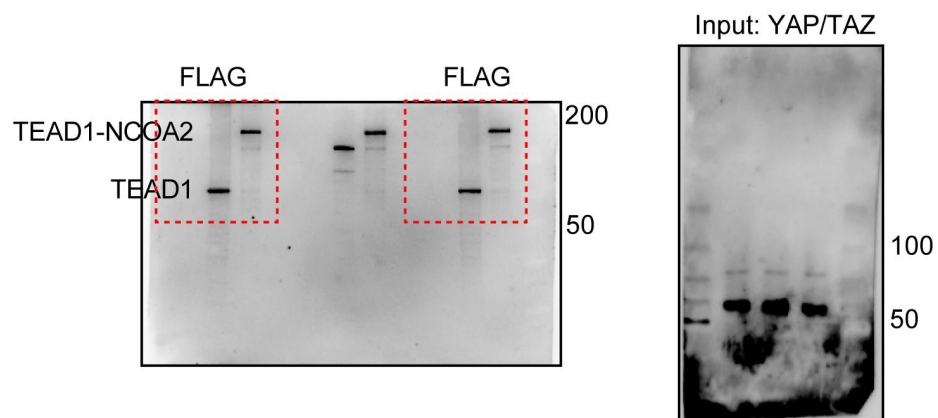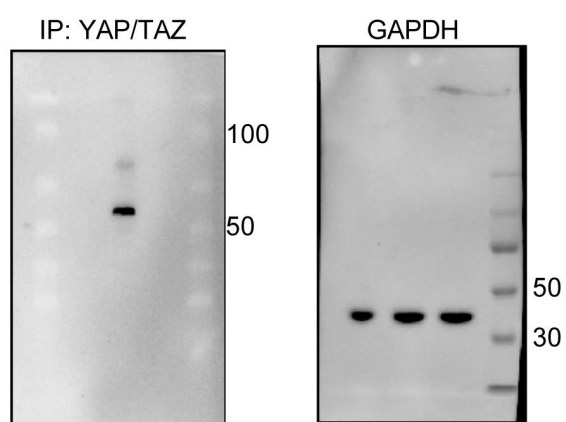

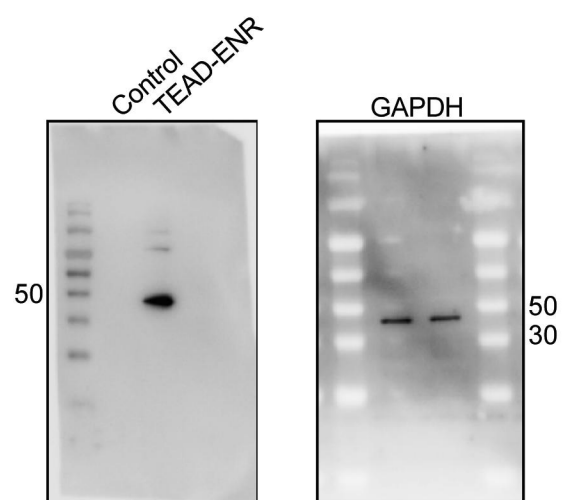

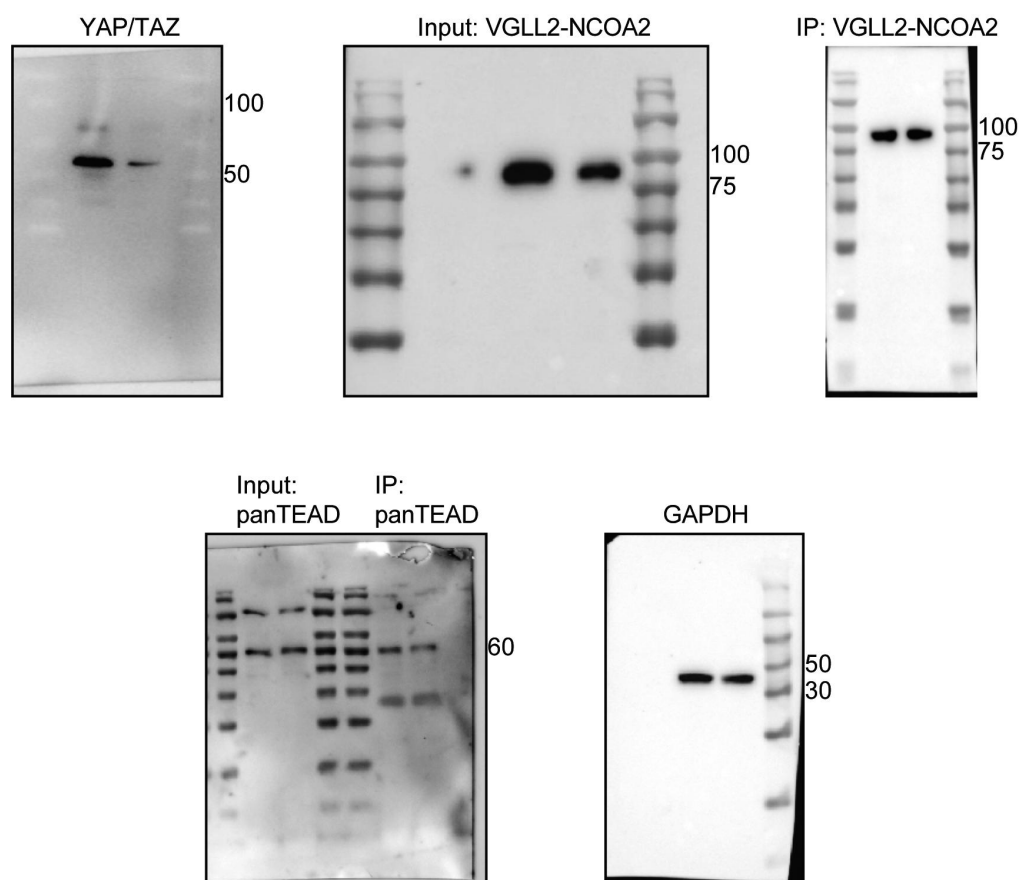

**Figure 2, Source Data 1.** Original western blot membranes corresponding to Figure 2A, 2B, 2C, 2F and 2G indicating the relevant bands. The molecular weight markers are indicated.
