# Supplementary material for: VGLL2 and TEAD1 fusion proteins identified in human sarcoma drive YAP/TAZ-independent tumorigenesis by engaging EP300
Source: eLife journal article supplement (doi:10.7554/elife.98386), 2024-07-01
Supplement: fig6-data1 [file elife-98386-fig6-data1-v1.zip]

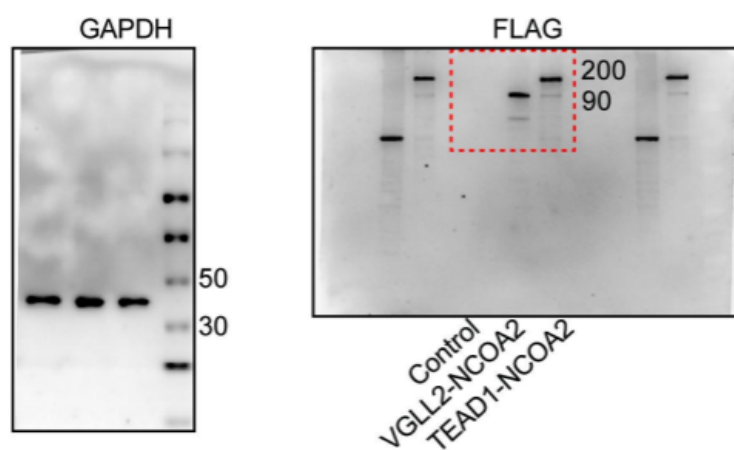

**Figure 6, Source Data 1.** Original western blot membranes corresponding to Figure 6B indicating the relevant bands. The molecular weight markers are indicated.
