# Supplementary material for: VGLL2 and TEAD1 fusion proteins identified in human sarcoma drive YAP/TAZ-independent tumorigenesis by engaging EP300
Source: eLife. 2025 May 8;13:RP98386. doi: 10.7554/eLife.98386 (PMC12061476; doi:10.7554/eLife.98386)
Supplement: Supplementary file 4. [file elife-98386-supp4.xls]

## Sheet: 1
Supplementary file 4. List of specific BioID hits obtained with BirA*-YAP5SA, BirA*-TAZ4SA, BirA*-VGLL2-NCOA2, and BirA*-TEAD1-NCOA2
YAP5SA hits	TAZ4SA hits	VGLL2-NCOA2 Hits	TEAD1-NCOA2 Hits
1433E	1433E	3HIDH	3HIDH
1433Z	4ET	AAAS	AATF
ABCBA	AAAS	AASS	AATM
ACLY	AAKG1	AATC	ABCD3
AFAD	AASS	AATF	ABCE1
AMOL1	ABCB7	AATM	ABCF1
AMOL2	ABCBA	ABCB7	ABCF2
AMOT	ABCF3	ABCD3	ACACA
ANM1	ACLY	ABCE1	ACACB
ANM3	ACSL3	ABCF1	ACBP
AP1B1	ACTZ	ABCF2	ACINU
AP2B1	ADDA	ACACA	ACINU
ARI1A	AFAD	ACACB	ACOT9
ARI1B	AGO1	ACBP	ACSL3
ARID2	AGO2	ACDSB	ACTN4
ASPP2	AGO3	ACINU	ADNP
ATG2B	AHNK	ACL6A	ADT1
ATRX	AKAP1	ACOT9	ADT2
BAG2	AL1A2	ACSF3	ADT3
BAP1	AL3A2	ACSL3	AFAD
BRE1A	ALG1	ADNP	AGK
CD2AP	ALMS1	ADT1	AHNK
CDK12	AMOL1	ADT2	AIMP2
CDK13	AMOL2	ADT3	AKAP1
CDK7	AMOT	AFG2H	AKAP8
CLPP	ANKH1	AGK	AKP8L
COPA	ANR17	AIMP2	ALDOC
CPSF4	ANS1A	AKAP1	AMOL1
CPVL	AP1B1	AKP8L	AMRP
CSTF3	AP1M1	AMOL1	ANFY1
CUL4A	AP2A1	ANFY1	ANLN
DHX36	AP2B1	ANKH1	ANR17
DIDO1	AP3M1	ANLN	ANXA1
E41L3	APC	ANR17	APC1
ECHD1	APC5	ANXA1	AQR
EDC4	ARI1A	AP3D1	ARHL2
ELP4	ARI1B	APC1	ARI1A
EMSY	ARID2	AQR	ARI1B
EP400	ARIP4	ARF6	ARI3A
EPN4	ARNT	ARI1A	ARI3B
EZRI	ASCC3	ARI1B	ARID2
FIP1	ASML	ARI3A	ARIP4
FUBP1	ASPP1	ARI3B	ARL1
GANP	ASPP2	ARID2	ARMT1
GCP2	AT1B3	ARIP4	ARP5L
GFPT1	AT2B1	ARL1	AT1A3
GGYF2	ATG2B	ARMT1	AT1A4
IF4E2	ATP5L	AT1A4	AT2A1
IFIT5	ATPO	AT2A2	AT2A2
INADL	ATX2	AT2B1	AT2B1
KAPCA	ATX2L	ATD3A	AT2B4
KINH	BABA2	ATD3B	ATD3A
LATS1	BAG2	ATLA3	ATD3B
LATS2	BCOR	ATRX	ATF7
MARE2	BICD2	AURKB	ATLA3
MCM2	BRCC3	BAF	ATP5J
MED17	BUB3	BAG3	ATRX
MED18	C19L2	BAZ1A	AURKB
MED27	CAMP1	BAZ1B	BAF
MERL	CAZA1	BBX	BAG3
MPDZ	CAZA2	BCL7C	BAP31
MPP5	CBL	BCOR	BAZ1A
MSD2	CC138	BEND3	BAZ1B
NDUA9	CC85C	BID	BAZ2A
NDUS1	CCD22	BLM	BCL7A
NDUV1	CCD43	BMI1	BCL7C
NHRF2	CD2AP	BMS1	BCOR
NSF	CDC37	BOP1	BEND3
NU188	CDK12	BOREA	BID
NU214	CDK13	BPTF	BLM
NUP54	CDK5	BRAT1	BLMH
NUP58	CDS2	BRD4	BMI1
OGT1	CE170	BRX1	BMS1
PDCD4	CE170	BYST	BOP1
PDLI5	CEP55	C1TM	BOREA
PGAM1	CEP85	CALM3	BPTF
PLSI	CHD5	CASP	BRAT1
PML	CIP2A	CATB	BRD4
PP4C	CLPX	CBP	BRD7
PP4R2	CNDP2	CBX8	BRD7
PPP6	CNO10	CC124	BRX1
PRP4B	CNO11	CCD86	BYST
PTN14	CNOT1	CCHL	C1TM
QCR2	CNOT7	CCNT1	CALD1
RADI	CNOT9	CD11B	CALM3
RASF8	CNTRB	CD81	CASP
RBBP6	CO039	CDC27	CATB
RPGF6	COF2	CDCA2	CBP
RSF1	COPA	CDIPT	CBX1
SAP18	COPZ1	CDK12	CBX8
SC23B	COX2	CDK13	CC124
SEP11	CPIN1	CDS2	CCD86
SEPT2	CPSF2	CDV3	CD11B
SEPT6	CPSF4	CEBPZ	CDC27
SEPT8	CPSF7	CEPT1	CDCA2
SF3B4	CPVL	CHAP1	CDK12
SMCA4	CRK	CHCH9	CDK13
SMCE1	CRTAP	CHD2	CDV3
SMRC1	CSDE1	CHD3	CEBPZ
SMRD1	CSTF1	CHD4	CG050
SMRD2	CSTF2	CHD5	CHAP1
SNX1	CSTF3	CHD6	CHD3
SPART	CSTFT	CHD7	CHD4
SPTC1	CTNB1	CHD8	CHD5
SRPK1	CTND1	CHD9	CHD6
STAT3	CTNL1	CIP2A	CHD7
STXB3	CUL4A	CKAP5	CHD8
SYWC	CYFP1	CLP1L	CING
TAF4	CYFP1	CLPX	CIZ1
TAF9	CYFP2	CMC1	CK5P3
TBCD	CYLD	CMC2	CKAP5
TBK1	DCAF7	CND1	CLCC1
TBL1R	DCP1A	CND2	CLPX
TBRG4	DCP1B	CND3	CMC1
TEAD1	DDX6	CNDD3	CMC2
TEAD2	DHB4	CNOT1	CND1
TEAD3	DHX29	CNPY2	CND2
TEAD4	DHX36	COASY	CND3
TIF1A	DHX57	COQ8A	CNOT1
TIM23	DI3L1	COR1C	CNPY2
TLE1	DIAP3	COX15	COASY
TLE3	DICER	CPT1A	COPG2
TLE4	DIDO1	CREB1	COQ8A
TLN1	DLG1	CRK	COR1C
TM165	DNJA2	CRNL1	COX15
TM9S3	DNJC7	CTBP2	CPSF4
TRI33	DOCK7	CTNA2	CPT1A
TSN	DPF1	CTND1	CREB1
TWF2	DPOLA	CTR9	CRK
TXNL1	DPYL2	CUX1	CRNL1
UCRI	DPYL5	CWC15	CTBP2
UN45A	DSG2	CYB5B	CTND1
UTP18	DVL1	CYC	CTR9
VCIP1	DVL2	CYTB	CUX1
WBP2	DVL3	DAAF5	CWC15
WDR5	DYL1	DACH1	CYB5B
WIPI2	DYL2	DCAF7	CYC
XRN1	E41L3	DCNL5	CYTB
YAP1	ECD	DDX10	DAAF5
ZCHC8	ECHD1	DDX18	DACH1
ZO1	EDC3	DDX20	DCAF7
ZO2	EDC4	DDX21	DDX10
	EFL1	DDX23	DDX18
	EI2BA	DDX24	DDX20
	EIF2A	DDX27	DDX21
	EIF3H	DDX3Y	DDX23
	EIF3L	DDX41	DDX24
	ELP1	DDX47	DDX27
	ELP4	DDX50	DDX3Y
	ELP5	DDX51	DDX41
	ELP6	DDX52	DDX47
	EMC1	DDX54	DDX50
	EMSY	DESP	DDX51
	EP15R	DHC24	DDX52
	EPN4	DHX15	DDX54
	EPS15	DHX36	DDX56
	ERBIN	DHX8	DEGS1
	ERC6L	DIC	DESP
	ESYT1	DIDO1	DHB11
	ESYT2	DIM1	DHC24
	ETFA	DJC11	DHX15
	EXOC4	DKC1	DHX37
	F184A	DNJB6	DHX8
	F91A1	DNLI3	DIC
	FACR1	DOPD	DIDO1
	FAF2	DPM1	DKC1
	FAKD5	DPOD1	DMAP1
	FANCJ	DREB	DNJB6
	FBRS	DRS7B	DNLI3
	FIP1	DSG2	DOCK7
	FL2D	DSRAD	DOPD
	FLII	DVL2	DPM1
	FUBP3	DYHC1	DPOD1
	GAPD1	E2AK2	DPOE3
	GCC1	EBP2	DREB
	GCP2	ECM29	DRS7B
	GCP60	EFHD2	DSRAD
	GEMI5	EFTS	DVL2
	GFPT1	EHD3	DYHC1
	GFPT1	EHD4	DYN2
	GGYF2	EHMT2	E2AK2
	GLMN	EI2BD	EBP2
	GOGA5	EMC1	ECM29
	GSE1	EP300	EFHD1
	HAUS3	EP400	EFHD2
	HAUS5	EPIPL	EFTS
	HAUS6	EPT1	EHD4
	HBS1L	ERC6L	EHMT1
	HELZ	ERLN1	EHMT2
	HGS	ESYT2	ELYS
	HTR5B	EXOSX	EMC1
	IDI1	EYA3	EMSA1
	IF4E2	FAF2	EMSY
	IF4G2	FAKD4	EP300
	IF4G3	FANCI	EP400
	IF4H	FBRL	EPIPL
	IFIT5	FBRS	EPN4
	IFT74	FHL1	ERH
	IFT81	FIP1	ERLN1
	IGBP1	FKBP8	ERLN2
	ILVBL	FLII	ESF1
	INADL	FLOT1	ESYT2
	INT4	FLOT2	EXOS9
	IPO8	FMR1	EXOSX
	IPO9	FXR1	EYA3
	IRAK1	FXR2	F120A
	ITSN1	GALK1	FAF2
	JIP4	GAPD1	FAKD4
	K0355	GBF1	FAKD5
	K1671	GCDH	FANCI
	K1C18	GCN1	FBRL
	KANK2	GEMI4	FBRS
	KAPCA	GEMI5	FIP1
	KCC2D	GGCT	FKBP8
	KDM6A	GLMN	FLII
	KEAP1	GLSK	FLOT2
	KIF7	GLYR1	FMR1
	KINH	GNA11	FMR1
	KLC1	GNL3	FOXK1
	KLC2	GNPI1	FXR1
	KNL1	GNS	FXR2
	LARP1	GRWD1	G45IP
	LATS1	GSE1	GALK1
	LATS2	GSE1	GANP
	LIMD1	GSHB	GAPD1
	LMO7	GSHR	GBF1
	LRBA	GT251	GCDH
	LTN1	GTR1	GCFC2
	LZTS2	H1BP3	GCN1
	M3K7	H2A1A	GDIR1
	MAGD1	H2A1B	GEMI
	MARE1	H2AW	GEMI4
	MARE2	H2AY	GEMI5
	MCA3	H2AZ	GLSK
	MCE1	H2B1L	GLYR1
	MCM2	H32	GNA11
	MED11	H33	GNL3
	MED17	H4	GNPAT
	MED20	HACD3	GNPI1
	MED23	HAP28	GNS
	MED27	HEAT1	GPTC4
	MERL	HEBP2	GPTC8
	MKL2	HELLS	GRWD1
	MP2K4	HIRA	GSE1
	MPDZ	HLTF	GSHB
	MPP5	HMGB2	GSHR
	MPP9	HMGB3	GT251
	MRT4	HMGN5	GTR1
	MTMR6	HNRC3	GWL
	MTMR9	HNRL2	H2A1A
	MYBB	HNRPC	H2A1B
	N4BP1	HNRPU	H2AW
	NADAP	HP1B3	H2AY
	NCKP1	HYEP	H2AZ
	NCOA1	IF2B2	H2B1L
	NCOA2	IF4B	H32
	NCOA5	IF4G3	H33
	NCOR1	ILVBL	H4
	NCOR2	IMP3	HACD3
	NDKA	INF2	HEAT1
	NDUA9	INT3	HEBP2
	NDUAD	IPO11	HELLS
	NED4L	IPO8	HIP1
	NEDD1	IPO9	HIRA
	NEK9	IRS4	HLTF
	NIN	ISOC2	HMGB2
	NP1L4	JIP4	HMGB3
	NPL4	JUN	HMGX4
	NSDHL	JUPI1	HNRC3
	NSF	K2C79	HNRL2
	NTPCR	KAISO	HNRPC
	NU188	KBP	HNRPU
	NU214	KDM1A	HP1B3
	NUFP2	KDM3A	HXA13
	NUP54	KDM5C	HXD13
	NUP58	KI67	HYEP
	NUP62	KIF23	IF2B
	NUP88	KIFC1	IF2B2
	NUP98	KINH	IF4B
	ODP2	KMT2B	IF4G3
	OFD1	KMT2D	IKIP
	OGA	KRR1	ILVBL
	OGT1	LARP1	INT1
	OPA1	LARP7	INT3
	OSB11	LAS1L	IPO9
	OSBL8	LBR	IRS4
	P3C2A	LC7L3	ISOC2
	P4R3B	LTV1	JHD2C
	PABP1	LYAR	JIP4
	PABP4	LYN	JUN
	PACE1	M2OM	JUPI1
	PACS1	MA7D1	JUPI2
	PALLD	MAGD1	K2C79
	PAPOG	MAGD2	KAISO
	PATL1	MAIP1	KBP
	PCID2	MANF	KDM1A
	PCNT	MAOM	KDM3A
	PDCD5	MAP4	KDM5C
	PDLI5	MARH5	KDM6A
	PFD3	MAT1	KI67
	PHAR4	MATR3	KIF22
	PHLP	MAVS	KIF23
	PICAL	MAZ	KIF2A
	PIHD1	MBB1A	KIF2C
	PKN2	MBD3	KIF4A
	PLAK	MCAT	KIFC1
	PLSI	MCCA	KINH
	PLST	MCCB	KMT2A
	PML	MDC1	KMT2B
	PNO1	MDN1	KMT2D
	PP1R7	MECP2	KNOP1
	PP6R3	MED1	KRI1
	PPIB	MED12	KRR1
	PPIL1	MED14	L2HDH
	PPIL2	MED17	LARP4
	PPP6	MED23	LARP7
	PRC2A	MGAP	LAS1L
	PRC2C	MINT	LBR
	PRI1	MIRO2	LC7L2
	PRUN1	MK67I	LC7L3
	PSA7	MMS19	LIMA1
	PSDE	MMTA2	LRRF2
	PSMD7	MO4L2	LRWD1
	PTN11	MOV10	LSM3
	PUM1	MPP10	LTOR1
	PUR8	MPP2	LYN
	QCR2	MPRIP	M2OM
	QRIC1	MSI1H	MA7D1
	RAE1L	MTA1	MACF1
	RANG	MTA3	MAGD1
	RASF7	MYH14	MAGD2
	RASF8	MYO1B	MAN1
	RAVR1	MYO1C	MANF
	RB3GP	MYO1D	MAOM
	RB6I2	MYO6	MAP4
	RB6I2	NACC1	MATR3
	RBBP6	NAT10	MAVS
	RBGPR	NBN	MAZ
	RBM12	NCLN	MBB1A
	RBM20	NCOA2	MBD3
	RBM33	NCOA5	MCAT
	RBM6	NCOA6	MCCA
	RENT1	NCOR1	MCCB
	RGPD8	NDC1	MDC1
	RL26	NDUAA	MDN1
	RL35A	NFIC	MECP2
	RL38	NFL	MED12
	RL7	NFM	MED14
	RN214	NFRKB	MED17
	RPAP3	NFU1	MED23
	RPB1	NHP2	MED4
	RPB2	NIPBL	MFAP1
	RPGF6	NKRF	MGAP
	RPGF6	NNRE	MIC13
	RS16	NNTM	MINT
	RT24	NOC2L	MIRO2
	RU17	NOC3L	MK67I
	S23IP	NOC4L	MMS19
	SALL2	NOG1	MMTA2
	SATB2	NOG2	MO4L2
	SC16A	NOL11	MORC4
	SC23A	NOL6	MOV10
	SC23B	NOL9	MPP5
	SC24A	NOP14	MPRIP
	SC24B	NOP16	MRTFB
	SC31A	NOP56	MSH3
	SCAF8	NOP58	MSI1H
	SCRIB	NOP9	MTA3
	SCRIB	NPA1P	MTOR
	SCYL2	NPS3A	MY18A
	SDCG3	NSF1C	MYH14
	SEC13	NSMA3	MYL6B
	SEC63	NT5D2	MYO1B
	SELB	NTPCR	MYO1C
	SENP3	NU107	MYO1D
	SEP11	NU133	MYO1E
	SEPT2	NU153	MYO6
	SEPT6	NU155	MYPT1
	SEPT7	NU160	NACC1
	SEPT8	NU188	NAT10
	SF01	NU205	NB5R1
	SF3B5	NU214	NBN
	SFR15	NUBP2	NC2B
	SFXN4	NUCB2	NCLN
	SH3G1	NUMA1	NCOA2
	SHIP2	NUP85	NCOA5
	SHPK	NUP93	NCOA6
	SLK	NUP98	NCOR1
	SMAG2	NVL	NDC1
	SMCE1	ODO1	NDUAA
	SMG1	OGT1	NEP1
	SMRC1	OPA1	NFIC
	SMRD1	ORC2	NFL
	SMRD1	ORC3	NFM
	SMRD2	ORC5	NFRKB
	SMRD3	ORN	NFU1
	SND1	P4HA2	NHP2
	SNTB2	P53	NIPA
	SNX1	P66A	NIPBL
	SPAG5	P66B	NKRF
	SPART	PABP3	NLE1
	SPD2B	PACN2	NNRE
	SPT5H	PAF1	NNTM
	SPTC1	PAXB1	NOC2L
	SRC8	PAXI1	NOC3L
	SRPK1	PB1	NOC4L
	STAT3	PCAT1	NOG1
	STAU1	PCBP3	NOG2
	STK24	PCCA	NOL11
	STK38	PCCB	NOM1
	STK39	PCH2	NOP14
	STRAP	PCKGM	NOP16
	STRN	PDS5A	NOP56
	STRN3	PDS5B	NOP58
	STXB4	PESC	NPA1P
	SUGP1	PFD5	NSD1
	SYAC	PGAM2	NSF1C
	SYMPK	PGAM4	NSMA3
	SYPM	PGAM5	NT5D2
	SYSC	PHF3	NTPCR
	SYVC	PIAS2	NU107
	SYWC	PIGT	NU133
	TAB1	PLAP	NU153
	TACC3	PLEC	NU155
	TBC15	PLEC	NU160
	TBCD	PLIN3	NU188
	TBCE	PLRG1	NU205
	TBD2B	POGZ	NU214
	TBK1	PP1RA	NUBP2
	TBRG4	PR38A	NUCB2
	TCF20	PR40A	NUMA1
	TEAD1	PRC2A	NUP85
	TEAD2	PRKDC	NUP93
	TEAD3	PRKDC	NVL
	TEAD4	PRP17	NXF1
	TELO2	PRP31	ODBA
	TF65	PRP4B	ODO1
	TFR1	PRP6	OGT1
	TIF1A	PRPF3	OPA1
	TIM23	PRR12	ORC2
	TLE1	PSA3	ORC3
	TLE3	PSB2	ORC5
	TLE3	PSB6	OSBL8
	TLE4	PSME1	P4HA2
	TLN1	PSME2	P53
	TM9S3	PTBP2	P66A
	TNIP1	PTMA	P66B
	TNR6A	PTPM1	PABP3
	TNR6B	PUM1	PACN2
	TOM40	PUM3	PAF1
	TRI25	PWP2	PAXB1
	TRI33	PYC	PAXI1
	TRIP6	PYR1	PB1
	TRIPB	QCR2	PBX1
	TRUA	RAB13	PCBP3
	TS101	RAB35	PCCA
	TSN	RAB3B	PCCB
	TTC28	RAB3D	PCH2
	TTC37	RAD50	PCID2
	TTF2	RAI1	PCKGM
	TTK	RALY	PCM1
	TWF2	RB12B	PDCD5
	U3IP2	RBBP6	PDS5A
	UBAP2	RBM14	PDS5B
	UBE2O	RBM15	PDXD1
	UBP15	RBM22	PESC
	UBP2L	RBM28	PEX14
	UBR4	RBM34	PGAM4
	UFD1	RBM39	PGAM5
	UGDH	RBM5	PHC2
	UN45A	RBMX	PHF3
	UTP18	RBP2	PIGT
	UTP6	RCL1	PKCB1
	UTRO	RCN2	PLAK
	VATH	RD23A	PLAP
	VCIP1	RED	PLEC
	VIGLN	RFC1	PLIN3
	WDR33	RFC5	PLRG1
	WWTR1	RFOX2	PO2F1
	XIAP	RFX1	PO2F3
	XRN1	RGAP1	POGZ
	YETS2	RHOG	PP1RA
	YTDC2	RIC8A	PPIE
	ZBED1	RIF1	PR38A
	ZCCHV	RING1	PR38B
	ZCHC8	RING2	PR40A
	ZEB2	RL10	PRKDC
	ZN318	RL13A	PRP16
	ZO1	RL17	PRP17
	ZO2	RL18A	PRP31
	ZW10	RL1D1	PRP31
		RL23	PRP4B
		RL27A	PRP6
		RL3	PRPF3
		RL32	PRR12
		RL38	PSA3
		RL4	PSA5
		RL7L	PSB2
		RL8	PSB4
		RL9	PSME1
		RM11	PSME2
		RM12	PTBP2
		RM13	PTBP2
		RM15	PTMA
		RM16	PTPM1
		RM21	PUM1
		RM38	PURA
		RM44	PWP2
		RM49	PYC
		RM54	PYR1
		RMXL1	QCR2
		RNPS1	QSER1
		RPA1	RAB13
		RPAB3	RAB35
		RPB1	RAB3B
		RPB2	RAD50
		RPC1	RAI1
		RPF2	RALY
		RREB1	RAP2C
		RRP1	RB12B
		RRP12	RBBP6
		RRP15	RBM14
		RRP1B	RBM15
		RRP5	RBM22
		RRS1	RBM28
		RS11	RBM34
		RS16	RBM39
		RS26	RBM5
		RS27A	RBMX
		RS27L	RBP2
		RS5	RCC2
		RS6	RCL1
		RS8	RCN2
		RS9	RDH14
		RT18B	RED
		RT22	REQU
		RT30	RFC1
		RTCA	RFC3
		RU17	RFC5
		S10AA	RFOX2
		SAFB1	RFX1
		SAFB2	RGAP1
		SAMH1	RHOG
		SATB2	RIF1
		SC16A	RING1
		SC24B	RING2
		SCMC1	RL10
		SCML2	RL13
		SCRB2	RL13A
		SENP3	RL17
		SET1A	RL18A
		SF3B5	RL1D1
		SFR15	RL22L
		SGPL1	RL23
		SGTA	RL27A
		SH3L1	RL3
		SIN3A	RL32
		SIN3B	RL38
		SKP1	RL4
		SMC2	RL7L
		SMC4	RL9
		SMCA1	RLF
		SMCA2	RM09
		SMCA4	RM10
		SMCA5	RM11
		SMCE1	RM12
		SMD1	RM15
		SMHD1	RM16
		SMRC1	RM17
		SMRC2	RM22
		SMRD3	RM24
		SMU1	RM28
		SNP23	RM38
		SNUT1	RM43
		SODC	RM49
		SODM	RMXL1
		SON	RMXL2
		SORCN	RNPS1
		SP16H	RPA1
		SP20H	RPB1
		SPB1	RPB2
		SPDLY	RPC1
		SPF30	RPC2
		SR140	RPF2
		SRCAP	RPOM
		SRP68	RREB1
		SRP72	RRP1
		SRPK1	RRP12
		SRRM1	RRP1B
		SRRM2	RRP5
		SRS10	RRS1
		SRS12	RS11
		SRSF1	RS16
		SRSF4	RS26
		SRSF5	RS27A
		SRSF7	RS27L
		SRSF9	RS5
		SSF1	RS6
		SSRP1	RS8
		STAG1	RS9
		STAG2	RT05
		STAT1	RT18B
		STAT3	RT22
		STAU1	RTCA
		STMN1	RU17
		STRBP	S10AA
		STT3A	S27A4
		STT3B	S30BP
		SUGP1	SAFB1
		SUGP2	SAFB2
		SUZ12	SALL1
		SYAM	SALL2
		SYEP	SAMH1
		SYFA	SAS10
		SYFB	SATB2
		SYHC	SC16A
		SYHM	SC24B
		SYIC	SCC4
		SYLC	SCMC1
		SYLM	SCML2
		SYMPK	SCRIB
		SYPM	SCRN1
		SYQ	SENP3
		SYRC	SET1A
		SYVC	SF3B3
		T2EB	SF3B5
		TADA3	SFR15
		TAF1	SFXN4
		TAF4	SGTA
		TAF6	SH3L1
		TAF6L	SIN3A
		TASOR	SIN3B
		TB182	SLU7
		TBA4A	SMC2
		TBL3	SMC4
		TCAF1	SMCA1
		TCF20	SMCA2
		TEAD1	SMCA4
		TEAD3	SMCA5
		TEAD4	SMCE1
		TECR	SMD1
		TF3C1	SMD2
		TF3C2	SMHD1
		TF3C3	SMRC1
		TF3C5	SMRC2
		TFP11	SMRD3
		TGO1	SMU1
		THIL	SNP23
		TIDC1	SNUT1
		TIF1A	SODC
		TIM23	SODM
		TIRR	SON
		TITIN	SORCN
		TLE2	SP16H
		TLE4	SP20H
		TM214	SPAG7
		TOIP2	SPB1
		TOM22	SPDLY
		TOP1	SPF27
		TOP2A	SPF30
		TOP2B	SR140
		TOX4	SRCAP
		TPM1	SRP68
		TPM3	SRP72
		TPM4	SRPK1
		TPX2	SRRM1
		TRA2A	SRRM2
		TRA2B	SRS10
		TRI27	SRS12
		TRI33	SRSF1
		TRIPC	SRSF2
		TRM1L	SRSF4
		TRRAP	SRSF9
		TSR1	SSRP1
		TTF2	STAG1
		TXTP	STAG2
		UBE2N	STAT1
		UBP10	STAT3
		UBQL4	STAU1
		UBR4	STMN1
		UBR5	STRBP
		UFL1	STT3A
		UHRF1	STT3B
		UN45A	SUGP1
		USO1	SUGP2
		USP9X	SUH
		UT14A	SURF6
		UT14A	SUZ12
		UTP15	SYAM
		UTP18	SYEP
		UTP20	SYFA
		UTP4	SYFB
		VIR	SYHC
		WAPL	SYHM
		WBP11	SYIC
		WDR3	SYLC
		WDR33	SYLM
		WDR36	SYMPK
		WDR43	SYRC
		WDR75	SYTM
		WIZ	SYVC
		WRIP1	T126A
		XPO5	T2EA
		XPOT	T2EB
		YETS2	TAD2B
		YLPM1	TAF6
		YMEL1	TAF6L
		Z280C	TASOR
		ZBT10	TB182
		ZC11A	TBA4A
		ZC3HE	TBB6
		ZCCHV	TBCD
		ZCH18	TBL3
		ZFHX4	TCF20
		ZFR	TEAD1
		ZMYM1	TEAD3
		ZMYM2	TEAD4
		ZMYM4	TECR
		ZN148	TF3C1
		ZN281	TF3C2
		ZN281	TF3C3
		ZN318	TF3C5
		ZN326	TF3C5
		ZN384	TFP11
		ZN512	TGO1
		ZN638	TIF1A
		ZO1	TIM23
		ZW10	TIM50
		ZYX	TIRR
			TM214
			TMOD3
			TNPO3
			TOIP2
			TOP1
			TOP2A
			TOP2B
			TOX4
			TPM1
			TPM2
			TPM3
			TPM4
			TPX2
			TRA2A
			TRA2B
			TRI33
			TRIPC
			TRM1L
			TRRAP
			TSR1
			TTK
			TWF1
			TXN4A
			TXTP
			UBE2N
			UBQL4
			UBR4
			UBR5
			UCK2
			UFL1
			UN45A
			URB2
			USMG5
			USO1
			USP9X
			USP9Y
			UT14A
			UTP15
			UTP18
			UTP20
			UTP4
			VATH
			VIR
			VPS72
			WAPL
			WBP11
			WDR3
			WDR33
			WDR36
			WDR43
			WDR44
			WDR75
			WIZ
			WRIP1
			WWTR1
			XIAP
			XPO5
			XPOT
			YETS2
			YLPM1
			YMEL1
			YTDC2
			Z280C
			Z512B
			ZBT10
			ZBT21
			ZC11A
			ZC3H4
			ZC3HE
			ZCCHV
			ZFHX4
			ZFR
			ZMYM1
			ZMYM2
			ZMYM3
			ZMYM4
			ZN148
			ZN281
			ZN318
			ZN326
			ZN362
			ZN384
			ZN516
			ZN629
			ZN638
			ZN644
			ZN687
			ZN746
			ZO1
			ZW10
			ZZZ3
